# Supplementary material for: Facilitated Visual Interpretation of Scores in Principal Component Analysis by Bioactivity-Labeling of 1H-NMR Spectra—Metabolomics Investigation and Identification of a New α-Glucosidase Inhibitor in Radix Astragali
Source: PubMed Central journal article supplement (PMC6155417; doi:10.3390/molecules22030411), 2017-03-06
Supplement: molecules-22-00411-s001.pdf [file molecules-22-00411-s001.pdf]

*Supplementary Material for*

Facilitated visual interpretation of scores in principal component analysis by bioactivity-labeling of  $^1\text{H}$  NMR spectra - metabolomics investigation and identification of a new  $\alpha$ -glucosidase inhibitor in *Radix Astragali*

Yueqiu Liu<sup>a</sup>, Nils T. Nyberg<sup>a</sup>, Anna K. Jäger<sup>a</sup>, Dan Staerk<sup>a,\*</sup>

*<sup>a</sup>Department of Drug Design and Pharmacology, Faculty of Health and Medical Sciences, University of Copenhagen, Universitetsparken 2, DK-2100 Copenhagen, Denmark*

\*Corresponding author. Tel.: +45 35336177; fax: +45 35336001.

*E-mail address:* ds@sund.ku.dk (D. Staerk).

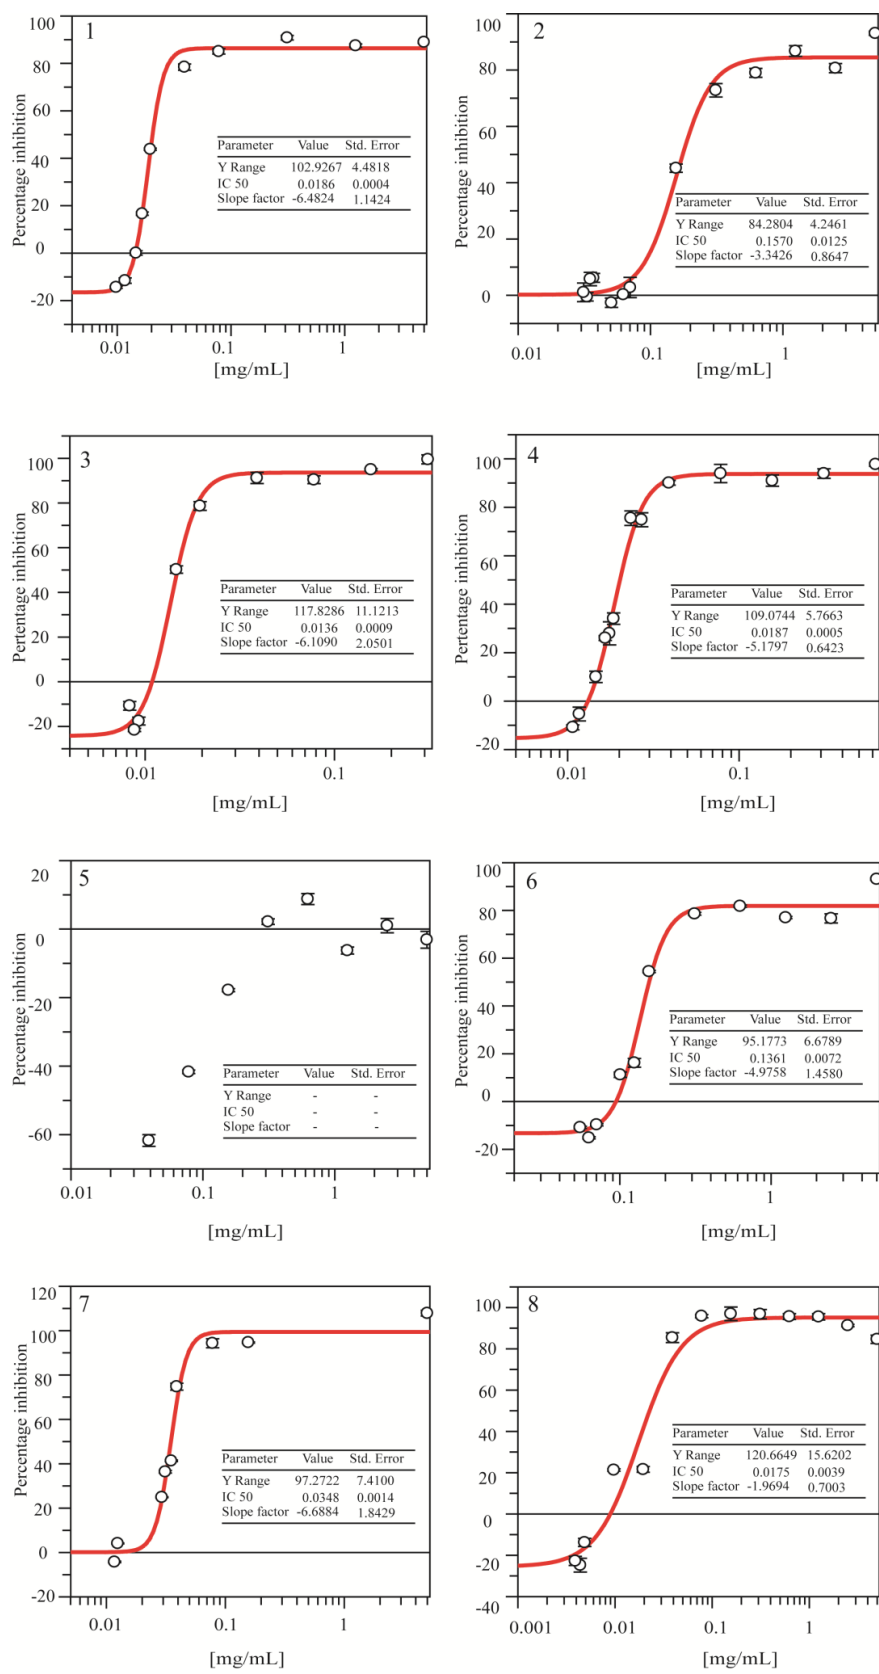

**Figure S1.** Inhibition curves of the ethyl acetate extracts of 21 samples of Radix Astragali in the  $\alpha$ -glucosidase inhibition assay.

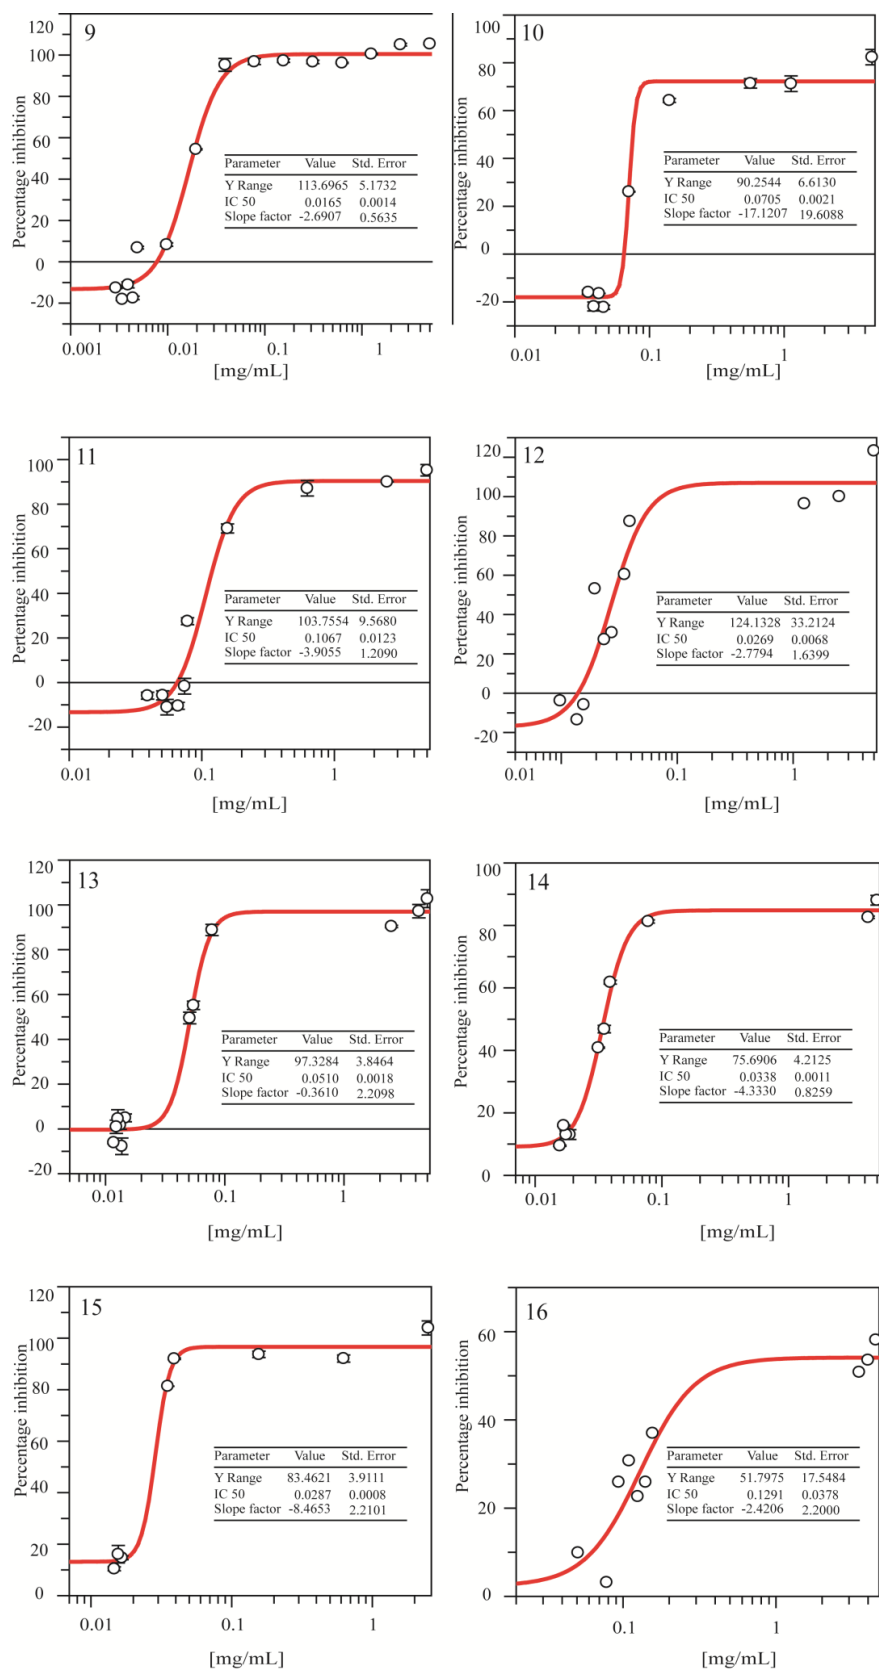

**Figure S1 continued.** Inhibition curves of the ethyl acetate extracts of 21 samples of Radix Astragali in the  $\alpha$ -glucosidase inhibition assay.

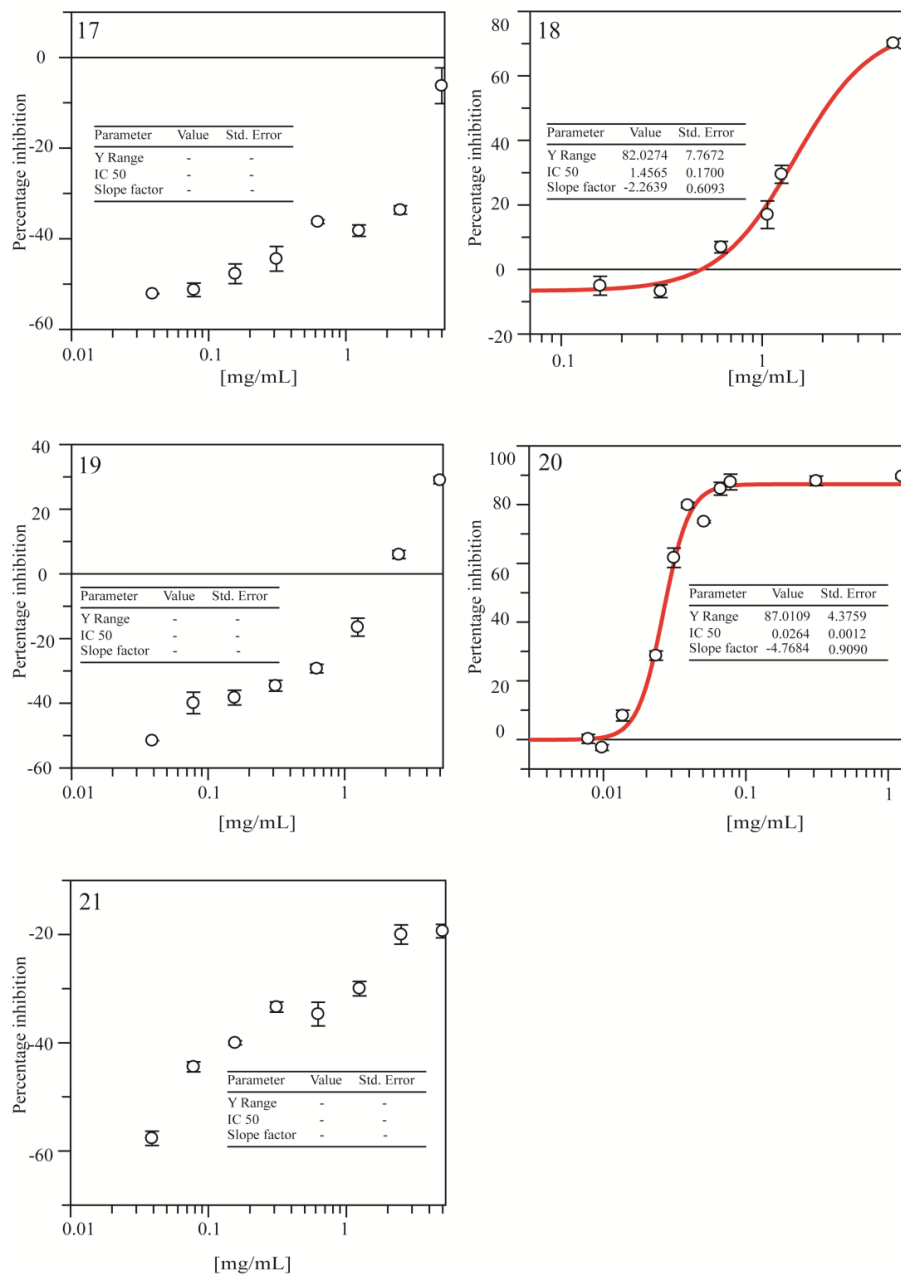

**Figure S1 continued.** Inhibition curves of the ethyl acetate extracts of 21 samples of Radix Astragali in the  $\alpha$ -glucosidase inhibition assay.

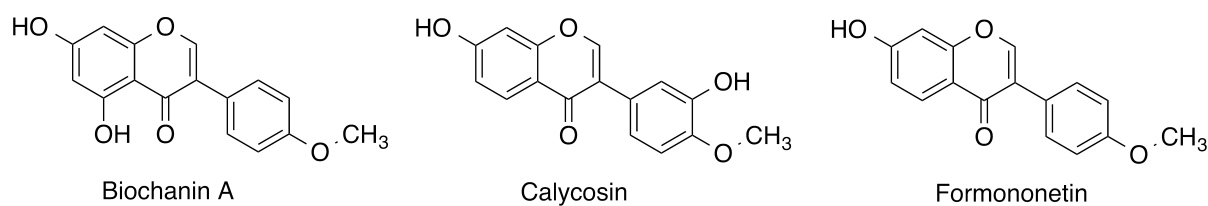

**Figure S2.** Radix Astragali isoflavones with expected  $\alpha$ -glucosidase inhibitory activity.

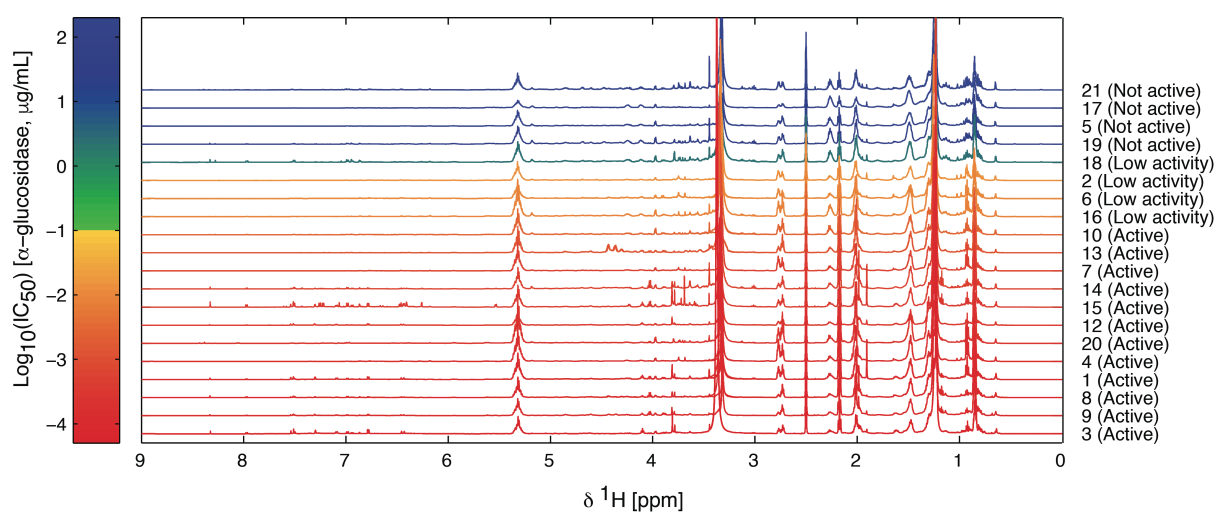

**Figure S3.** 600 MHz  $^1\text{H}$  NMR spectra of ethyl acetate extracts of Radix Astragali samples dissolved in  $\text{DMSO-}d_6$ . The color and order of the spectra reflects the inhibitory activity in the  $\alpha$ -glucosidase assay according to the bar to the left. The number to the right gives the number of the sample. Active extracts are those with  $\text{IC}_{50}$  values  $< 100 \mu\text{g/mL}$  and extracts with low activity are those with  $\text{IC}_{50}$  values  $\geq 100 \mu\text{g/mL}$ . The non-active extract # 19 showed only 30 % inhibition at a concentration of 5 mg/mL and the remaining non-active extracts were arbitrarily set to 10 mg/mL for plotting purposes.

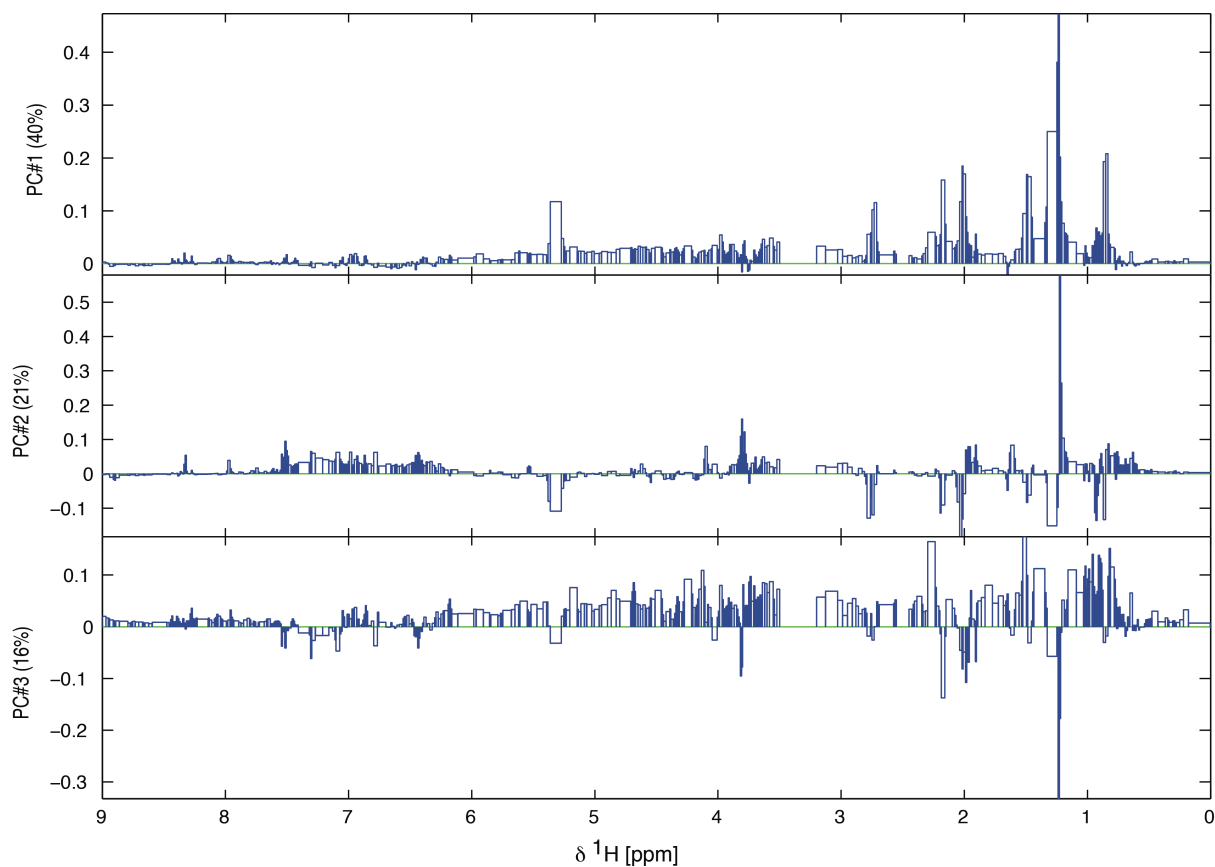

**Figure S4.** PCA-loading values for components #1, #2 and #3 plotted on the chemical shift axis.

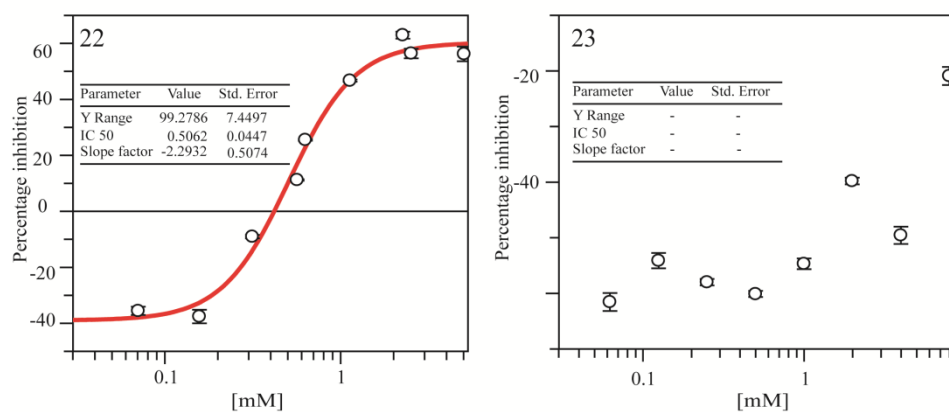

**Figure S5.**  $\alpha$ -Glucosidase inhibition curves: linoleyl ferulate (**1**, sample 22) and hexadecyl ferulate (**2**, sample 23).
